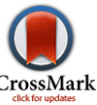

## Correction

# Correction: Association between RANTES Gene Polymorphisms and Asthma: A Meta-Analysis

The *PLOS ONE* Staff

Figures 3 and 4 are incorrect. The authors have provided corrected versions here.

In addition, some information is missing from the Funding section. The correct Funding statement is: The study was supported by grants from Beijing Municipal Administration of Hospitals Clinical Medicine Development of Special Funding Support (ZY201302), Ministry of S&T Program of Chinese Arrhythmia Registration Study (2013BAI09B02), and International S&T Cooperation Program of China (No. 2013DFB30310). The funders had no role in study design, data collection and analysis, decision to publish, or preparation of the manuscript.

---

**Citation:** The *PLOS ONE* Staff (2014) Correction: Association between RANTES Gene Polymorphisms and Asthma: A Meta-Analysis. *PLoS ONE* 9(10): e111818. doi:10.1371/journal.pone.0111818

**Published:** October 17, 2014

**Copyright:** © 2014 The *PLOS ONE* Staff. This is an open-access article distributed under the terms of the Creative Commons Attribution License, which permits unrestricted use, distribution, and reproduction in any medium, provided the original author and source are credited.

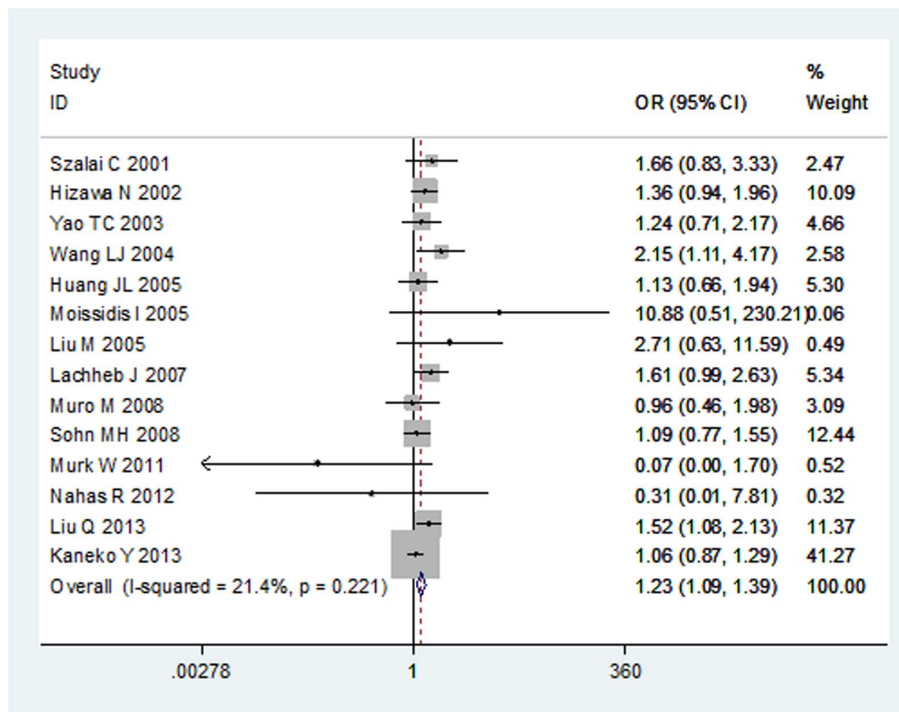

**Figure 3: The association between RANTES -28C/G polymorphism and asthma in dominant model.**  
doi:10.1371/journal.pone.0090460.g003

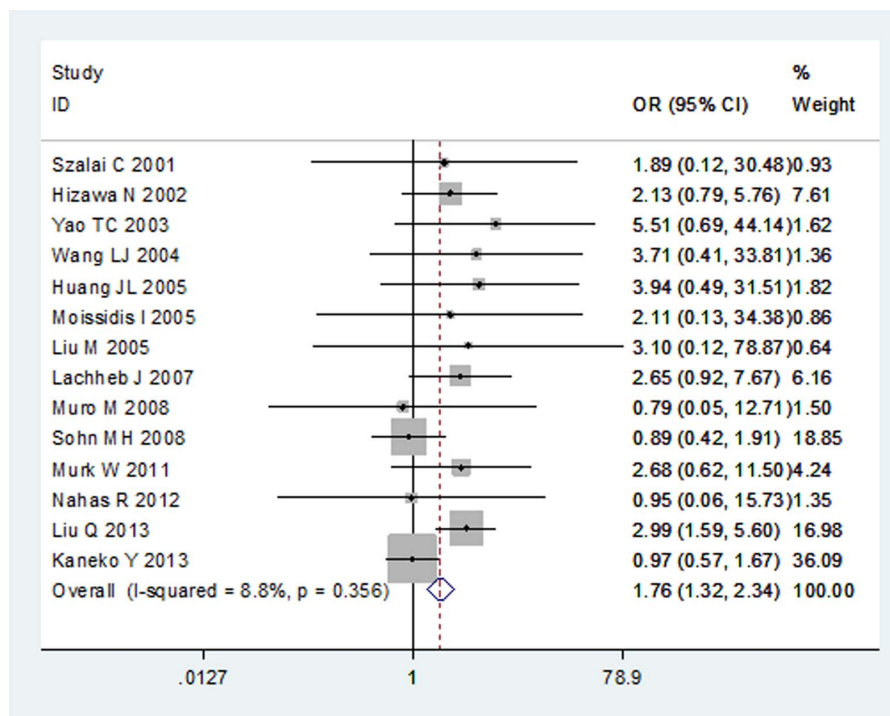

**Figure 4: The association between RANTES -28C/G polymorphism and asthma in recessive model.**  
doi:10.1371/journal.pone.0090460.g004

## Reference

1. Wen D, Du X, Nie S-P, Dong J-Z, Ma C-S (2014) Association between RANTES Gene Polymorphisms and Asthma: A Meta-Analysis. *PLoS ONE* 9(6): e90460. doi:10.1371/journal.pone.0090460
